# Supplementary material
Source: Springer Nature journal article supplement (https://www.springermedizin.de/resource/supplementary/13058_2013_3448_MOESM9_ESM.pdf/9704034)

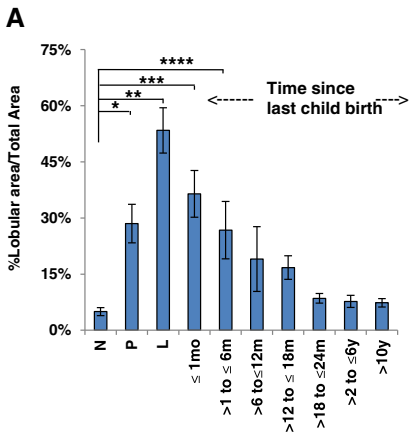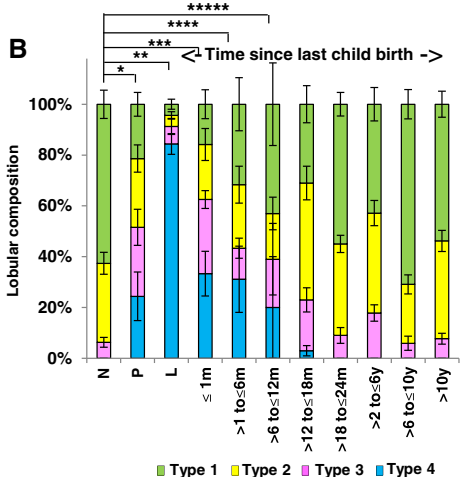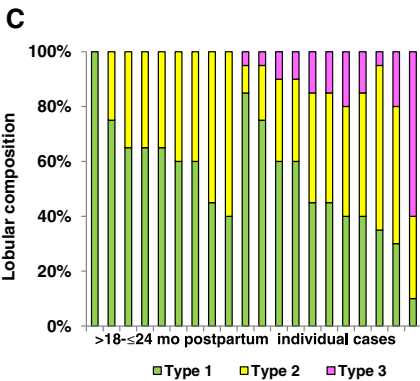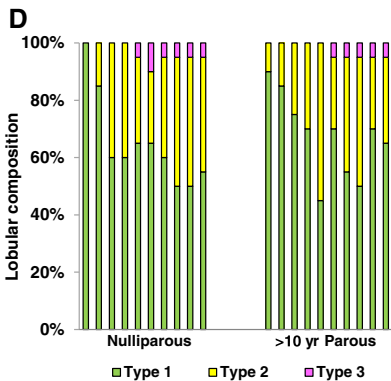

Supplement: MOESM9 [file 9704034]
